# Supplementary material
Source: PubMed Central journal article supplement (PMC7238369)
Supplement: SupplementalMaterial4.pdf [file SupplementalMaterial4.pdf]

**Supplemental Figure 1. TSPO expression in negative and autofluorescent cells in response to unilateral brain injection of LPS or CNTF**

Animals received either LPS (a-c) or CNTF (d-f). The radioactivity (%injected dose /g of tissue, %ID/g) was measured in each cell population (a,d) in the ipsilateral (red) and the contralateral (blue) side of the injection. (b,e) Radioactivity per cell (%injected dose/cell) in each cell population in the ipsilateral (red) and the contralateral (blue) side of the injection. (c,f) number of cells sorted in the ipsilateral (red) and the contralateral (blue) side of the injection. Abbreviations: AF, autofluorescent; Cont., contralateral; CNTF, ciliary neurotrophic factor; LPS, lipopolysaccharide; Neg, cells negative for all markers.

**Supplemental Figure 2. TSPO expression in negative and autofluorescent cells in response to unilateral brain injection of Saline and in untreated rats**

Animals received saline (a-c) or were untreated (d-f). The radioactivity (%injected dose /g of tissue, %ID/g) was measured in each cell population (a,d) in the ipsilateral (red) and the contralateral (blue) side of the injection. (b,e) Radioactivity per cell (%injected dose/cell) in each cell population in the ipsilateral (red) and the contralateral (blue) side of the injection. (c,f) number of cells sorted in the ipsilateral (red) and the contralateral (blue) side of the injection. Abbreviations: AF, autofluorescent; Cont., contralateral; Neg, cells negative for all markers.

**Supplemental Figure 3. TSPO expression in negative and autofluorescent cells in frontal cortex of Alzheimer's disease *post mortem* human brain**

(a) Radioactivity (%injected dose /g of tissue) in each cell population in control (blue) and AD (red) subjects. (b) Radioactivity per cell (%injected dose /cell) in the cell population in control (blue) and AD (red) subjects. (c) Number of cells in control (blue) and AD (red) subjects. Abbreviations: AF, autofluorescent; Neg, cells negative for all markers.
